# Supplementary material
Source: MDPI journal article supplement (https://www.mdpi.com/2077-0472/12/9/1502)
Supplement: s1 [file s1]

**Table S1.** Mean pairwise comparisons of growth trait interactions between accessions and plant treated by MOE. According to the Multiple Range Duncan's test at  $p \leq 0.05$ , any mean values with a common letter are not considered significant.

| Accession*Treatment | PH (cm)                | LA (cm <sup>2</sup> ) | TCC (SPAD)            | Accession*Treatment | PH (cm)                | LA (cm <sup>2</sup> ) | TCC (SPAD)            |
|---------------------|------------------------|-----------------------|-----------------------|---------------------|------------------------|-----------------------|-----------------------|
| AC1*WOM             | 51.27 a-x $\pm$ 0.18   | 14.26 b-i $\pm$ 0.65  | 14.17 f-s $\pm$ 2.68  | AC30*WM             | 96.13 i-l $\pm$ 0.68   | 15.41 bc $\pm$ 0.41   | 18.97 cde $\pm$ 0.95  |
| AC1*WM              | 53.07 a-x $\pm$ 0.47   | 14.58 b-g $\pm$ 1.22  | 16.17 c-l $\pm$ 0.32  | AC31*WOM            | 91.67 r-aa $\pm$ 0.64  | 9.06 am-ax $\pm$ 0.27 | 13.10 h-w $\pm$ 1.06  |
| AC2*WOM             | 69.53 at-au $\pm$ 0.58 | 9.52 af-au $\pm$ 0.53 | 14.87 e-q $\pm$ 2.28  | AC31*WM             | 86.60 ag-am $\pm$ 0.70 | 14.05 b-j $\pm$ 0.58  | 16.23 c-k $\pm$ 0.46  |
| AC2*WM              | 87.67 ad-al $\pm$ 0.52 | 12.05 k-aa $\pm$ 0.23 | 16.07 c-m $\pm$ 1.94  | AC32*WOM            | 93.40 k-v $\pm$ 0.70   | 8.96 an-ax $\pm$ 0.50 | 10.30 o-ah $\pm$ 1.76 |
| AC3*WOM             | 69.07 au-av $\pm$ 0.29 | 11.11 u-ai $\pm$ 0.32 | 8.67 u-ai $\pm$ 0.29  | AC32*WM             | 94.87 j-r $\pm$ 0.24   | 12.10 k-aa $\pm$ 0.30 | 13.93 f-s $\pm$ 1.24  |
| AC3*WM              | 80.73 ao-ap $\pm$ 0.24 | 11.19 t-ai $\pm$ 0.60 | 12.50 i-y $\pm$ 1.66  | AC33*WOM            | 93.60 k-v $\pm$ 0.46   | 9.08 al-ax $\pm$ 0.03 | 7.60 y-ai $\pm$ 1.02  |
| AC4*WOM             | 73.80 as-at $\pm$ 0.12 | 10.55 z-ap $\pm$ 0.46 | 10.80 n-ah $\pm$ 1.36 | AC33*WM             | 94.67 j-r $\pm$ 0.53   | 10.78 x-an $\pm$ 0.49 | 9.63 r-ai $\pm$ 1.14  |
| AC4*WM              | 88.80 z-ai $\pm$ 0.31  | 13.75 b-k $\pm$ 0.55  | 10.00 p-ah $\pm$ 0.35 | AC34*WOM            | 91.67 r-aa $\pm$ 0.44  | 9.01 an-ax $\pm$ 0.23 | 10.40 o-ah $\pm$ 0.57 |
| AC5*WOM             | 60.53 a-w $\pm$ 0.29   | 11.57 n-ac $\pm$ 0.68 | 8.53 v-ai $\pm$ 1.78  | AC34*WM             | 100.80 fgh $\pm$ 0.69  | 11.03 u-ak $\pm$ 0.65 | 7.37 z-ai $\pm$ 0.71  |
| AC5*WM              | 71.27 at-au $\pm$ 0.33 | 12.80 g-w $\pm$ 0.52  | 12.97 h-w $\pm$ 3.18  | AC35*WOM            | 86.87 ag-al $\pm$ 1.62 | 7.64 av-ay $\pm$ 0.44 | 18.27 c-g $\pm$ 1.56  |
| AC6*WOM             | 52.47 a-x $\pm$ 0.18   | 11.34 r-ag $\pm$ 0.56 | 14.93 e-p $\pm$ 1.74  | AC35*WM             | 94.53 j-s $\pm$ 0.07   | 13.17 e-r $\pm$ 0.46  | 17.33 c-i $\pm$ 1.19  |
| AC6*WM              | 73.40 as-at $\pm$ 0.40 | 13.27 e-p $\pm$ 0.28  | 12.03 j-aa $\pm$ 2.20 | AC36*WOM            | 87.00 af-al $\pm$ 0.95 | 4.85 a-z $\pm$ 0.23   | 8.73 u-ai $\pm$ 1.42  |
| AC7*WOM             | 84.93 ak-an $\pm$ 0.44 | 14.62 b-g $\pm$ 1.01  | 15.17 e-o $\pm$ 0.74  | AC36*WM             | 88.13 ac-ak $\pm$ 0.77 | 8.97 an-ax $\pm$ 0.27 | 9.77 r-ai $\pm$ 0.35  |
| AC7*WM              | 102.40 def $\pm$ 1.20  | 15.53 b $\pm$ 0.02    | 11.03 n-af $\pm$ 1.05 | AC37*WOM            | 90.47 v-ae $\pm$ 0.44  | 8.29 ar-ay $\pm$ 0.41 | 6.00 ag-ai $\pm$ 0.46 |
| AC8*WOM             | 67.93 a-v $\pm$ 0.18   | 11.36 r-af $\pm$ 0.22 | 10.57 o-ah $\pm$ 0.89 | AC37*WM             | 88.53 aa-ai $\pm$ 0.35 | 8.47 aq-ay $\pm$ 0.44 | 11.27 l-ae $\pm$ 1.26 |
| AC8*WM              | 67.73 a-v $\pm$ 0.58   | 14.42 b-h $\pm$ 0.31  | 14.33 e-r $\pm$ 0.52  | AC38*WOM            | 96.53 ijk $\pm$ 0.47   | 9.93 ab-as $\pm$ 0.22 | 6.07 af-ai $\pm$ 0.22 |
| AC9*WOM             | 84.80 al-an $\pm$ 0.31 | 9.45 ag-av $\pm$ 0.47 | 10.30 o-ah $\pm$ 0.97 | AC38*WM             | 89.53 y-ah $\pm$ 1.05  | 12.16 k-z $\pm$ 0.74  | 8.73 u-ai $\pm$ 0.64  |
| AC9*WM              | 92.00 p-z $\pm$ 0.35   | 12.35 j-z $\pm$ 0.36  | 13.73 g-t $\pm$ 1.44  | AC39*WOM            | 86.40 ah-am $\pm$ 0.81 | 11.23 s-ah $\pm$ 0.10 | 6.47 ad-ai $\pm$ 0.22 |
| AC10*WOM            | 71.40 at-au $\pm$ 0.31 | 10.92 w-am $\pm$ 0.72 | 10.40 o-ah $\pm$ 1.02 | AC39*WM             | 73.53 as-at $\pm$ 0.64 | 13.37 d-n $\pm$ 0.03  | 26.00 a $\pm$ 1.89    |
| AC10*WM             | 89.13 z-ai $\pm$ 0.18  | 12.62 h-x $\pm$ 0.65  | 12.03 j-aa $\pm$ 0.44 | AC40*WOM            | 90.53 v-ad $\pm$ 0.41  | 9.64 ad-au $\pm$ 0.75 | 11.27 l-ae $\pm$ 1.81 |
| AC11*WOM            | 75.47 ar-as $\pm$ 0.18 | 14.92 b-e $\pm$ 0.68  | 13.03 h-w $\pm$ 0.93  | AC40*WM             | 87.93 ad-al $\pm$ 0.55 | 9.53 af-au $\pm$ 0.29 | 12.83 h-w $\pm$ 2.03  |
| AC11*WM             | 102.80 def $\pm$ 0.50  | 17.43 a $\pm$ 0.61    | 10.77 n-ah $\pm$ 1.99 | AC41*WOM            | 76.40 aq-as $\pm$ 0.76 | 13.64 c-l $\pm$ 0.53  | 10.83 n-ah $\pm$ 1.13 |
| AC12*WOM            | 86.47 ag-am $\pm$ 0.73 | 10.67 y-ao $\pm$ 0.30 | 11.13 m-ae $\pm$ 1.44 | AC41*WM             | 69.07 au-av $\pm$ 1.09 | 13.58 d-m $\pm$ 0.23  | 13.23 h-v $\pm$ 0.62  |
| AC12*WM             | 92.73 n-x $\pm$ 0.29   | 9.61 ad-au $\pm$ 0.15 | 11.53 k-ac $\pm$ 0.75 | AC42*WOM            | 78.53 ap-aq $\pm$ 0.18 | 11.79 l-ab $\pm$ 0.17 | 9.43 r-ai $\pm$ 0.84  |
| AC13*WOM            | 92.40 o-y $\pm$ 0.50   | 11.09 u-aj $\pm$ 0.77 | 12.73 h-w $\pm$ 0.41  | AC42*WM             | 70.27 au-av $\pm$ 2.21 | 13.88 b-k $\pm$ 0.27  | 8.50 v-ai $\pm$ 0.47  |
| AC13*WM             | 92.87 m-w $\pm$ 0.41   | 10.62 z-ao $\pm$ 0.42 | 9.53 r-ai $\pm$ 1.10  | AC43*WOM            | 85.27 aj-an $\pm$ 0.84 | 9.19 ak-ax $\pm$ 0.21 | 16.17 c-l $\pm$ 4.89  |
| AC14*WOM            | 91.80 q-z $\pm$ 0.90   | 9.98 ab-as $\pm$ 0.33 | 14.00 f-s $\pm$ 1.63  | AC43*WM             | 93.87 j-u $\pm$ 0.13   | 9.96 ab-as $\pm$ 0.68 | 23.43 ab $\pm$ 0.78   |
| AC14*WM             | 94.00 j-u $\pm$ 0.35   | 12.53 i-y $\pm$ 0.64  | 11.87 j-ab $\pm$ 0.97 | AC44*WOM            | 87.07 af-al $\pm$ 1.12 | 7.93 at-ay $\pm$ 0.27 | 10.10 p-ah $\pm$ 2.29 |
| AC15*WOM            | 94.73 j-r $\pm$ 0.66   | 13.32 d-o $\pm$ 0.60  | 11.20 m-ae $\pm$ 0.99 | AC44*WM             | 95.20 j-p $\pm$ 0.12   | 8.74 ap-ay $\pm$ 0.17 | 11.23 l-ae $\pm$ 1.09 |
| AC15*WM             | 102.13 ef $\pm$ 0.35   | 17.41 a $\pm$ 0.42    | 11.10 n-ae $\pm$ 1.29 | AC45*WOM            | 91.27 t-ac $\pm$ 1.17  | 9.22 aj-aw $\pm$ 0.50 | 7.70 x-ai $\pm$ 1.07  |

|          |                    |                    |                   |          |                    |                    |                   |
|----------|--------------------|--------------------|-------------------|----------|--------------------|--------------------|-------------------|
| AC16*WOM | 94.93 j-q ± 1.37   | 12.52 i-y ± 0.55   | 16.57 c-j ± 0.27  | AC45*WM  | 98.60 hi ± 0.46    | 9.36 ah-av ± 0.29  | 11.03 n-af ± 2.02 |
| AC16*WM  | 105.27 d ± 0.66    | 17.31 a ± 0.46     | 9.17 s-ai ± 0.15  | AC46*WOM | 87.27 ae-al ± 0.67 | 9.56 ae-au ± 0.25  | 9.20 s-ai ± 1.17  |
| AC17*WOM | 94.60 j-s ± 0.42   | 9.75 ac-at ± 0.46  | 13.13 h-v ± 0.26  | AC46*WM  | 78.40 ap-aq ± 0.58 | 12.76 g-w ± 0.66   | 12.60 i-x ± 0.36  |
| AC17*WM  | 96.93 ij ± 0.29    | 12.82 g-v ± 1.38   | 17.60 c-h ± 2.53  | AC47*WOM | 83.73 am-an ± 0.87 | 8.28 ar-ay ± 0.18  | 7.00 ab-ai ± 0.21 |
| AC18*WOM | 77.20 aq-ar ± 0.64 | 10.80 y-ao ± 0.30  | 8.50 v-ai ± 1.31  | AC47*WM  | 93.27 l-w ± 0.18   | 12.22 j-z ± 0.27   | 8.70 u-ai ± 1.11  |
| AC18*WM  | 93.33 k-w ± 0.57   | 11.05 u-ak ± 0.48  | 6.43 ad-ai ± 0.63 | AC48*WOM | 86.13 ai-am ± 0.47 | 10.95 v-al ± 0.59  | 7.30 z-ai ± 0.55  |
| AC19*WOM | 73.60 as-at ± 0.23 | 13.03 f-t ± 0.05   | 11.10 n-ae ± 0.62 | AC48*WM  | 98.87 ghi ± 1.19   | 13.31 d-o ± 0.83   | 9.93 q-ai ± 0.44  |
| AC19*WM  | 75.20 ar-as ± 0.35 | 15.14 bcd ± 0.57   | 9.43 r-ai ± 0.67  | AC49*WOM | 88.20 ac-aj ± 3.20 | 11.45 o-ae ± 0.33  | 6.10 af-ai ± 0.12 |
| AC20*WOM | 76.20 aq-as ± 0.72 | 9.60 ad-au ± 0.67  | 5.07 a-i ± 0.18   | AC49*WM  | 96.13 ijk ± 0.18   | 10.83 x-an ± 0.41  | 11.17 m-ae ± 1.17 |
| AC20*WM  | 73.80 as-at ± 0.31 | 11.41 p-af ± 0.52  | 10.17 p-ah ± 0.82 | AC50*WOM | 95.93 i-n ± 0.57   | 8.06 at-ay ± 1.14  | 11.87 j-ab ± 0.92 |
| AC21*WOM | 95.40 j-o ± 0.31   | 11.39 q-af ± 0.58  | 14.00 f-s ± 0.46  | AC50*WM  | 102.93 def ± 0.07  | 10.09 ab-ar ± 1.00 | 12.40 j-y ± 1.53  |
| AC21*WM  | 109.80 c ± 0.53    | 13.89 b-k ± 0.50   | 12.23 j-z ± 0.23  | AC51*WOM | 104.87 de ± 0.98   | 18.48 a ± 0.76     | 13.80 g-t ± 2.51  |
| AC22*WOM | 85.13 aj-an ± 0.48 | 10.84 x-an ± 0.13  | 13.67 g-u ± 1.19  | AC51*WM  | 89.53 y-ah ± 0.37  | 14.75 b-f ± 0.50   | 14.43 e-r ± 0.90  |
| AC22*WM  | 88.07 ac-ak ± 0.29 | 12.88 f-u ± 0.60   | 11.70 j-ab ± 1.80 | AC52*WOM | 93.60 k-v ± 0.61   | 11.09 u-aj ± 0.37  | 10.37 o-ah ± 0.84 |
| AC23*WOM | 74.53 ar-as ± 1.57 | 7.78 au-ay ± 0.19  | 6.30 ae-ai ± 0.26 | AC52*WM  | 90.87 u-ad ± 0.64  | 11.24 s-ah ± 0.94  | 13.77 g-t ± 0.26  |
| AC23*WM  | 90.20 w-af ± 0.12  | 8.66 aq-ay ± 0.29  | 8.90 t-ai ± 0.55  | AC53*WOM | 85.13 aj-an ± 0.87 | 11.75 m-ab ± 0.41  | 11.30 k-ad ± 0.76 |
| AC24*WOM | 96.13 i-l ± 0.07   | 7.49 aw-ay ± 0.58  | 5.93 ah-ai ± 0.96 | AC53*WM  | 86.93 ag-al ± 0.55 | 9.32 ai-aw ± 0.30  | 6.40 ad-ai ± 0.44 |
| AC24*WM  | 94.73 j-r ± 0.13   | 8.12 as-ay ± 0.41  | 8.10 w-ai ± 2.06  | AC54*WOM | 88.33 ab-aj ± 0.87 | 7.37 ax-ay ± 0.42  | 8.47 v-ai ± 0.15  |
| AC25*WOM | 101.47 fg ± 0.97   | 10.24 aa-aq ± 0.90 | 9.20 s-ai ± 1.25  | AC54*WM  | 89.47 y-ah ± 0.52  | 7.80 au-ay ± 0.02  | 8.73 u-ai ± 0.44  |
| AC25*WM  | 98.53 hi ± 0.47    | 13.56 d-m ± 0.73   | 13.67 g-u ± 1.00  | AC55*WOM | 104.53 de ± 0.58   | 9.97 ab-as ± 0.60  | 16.53 c-j ± 0.69  |
| AC26*WOM | 89.53 y-ah ± 0.47  | 6.97 a-y ± 0.23    | 7.10 aa-ai ± 0.12 | AC55*WM  | 103.53 def ± 0.13  | 8.81 ao-ax ± 0.40  | 15.67 d-n ± 0.96  |
| AC26*WM  | 83.60 am-an ± 0.46 | 12.87 g-u ± 0.18   | 12.43 i-y ± 0.64  | AC56*WOM | 110.27 c ± 0.48    | 13.27 e-p ± 0.62   | 17.60 c-h ± 2.12  |
| AC27*WOM | 82.93 an-ao ± 0.07 | 10.03 ab-ar ± 0.63 | 6.63 ac-ai ± 0.78 | AC56*WM  | 108.33 c ± 0.47    | 13.39 d-n ± 0.29   | 11.47 k-ac ± 0.57 |
| AC27*WM  | 95.47 j-o ± 0.29   | 11.54 n-ac ± 0.88  | 6.70 ac-ai ± 0.55 | AC57*WOM | 103.07 def ± 6.73  | 13.84 b-k ± 0.80   | 13.87 f-t ± 1.98  |
| AC28*WOM | 91.40 s-ab ± 0.83  | 8.50 aq-ay ± 0.47  | 19.97 bcd ± 4.07  | AC57*WM  | 117.00 a ± 1.11    | 14.07 b-j ± 0.16   | 10.97 n-af ± 1.38 |
| AC28*WM  | 103.20 def ± 0.46  | 15.51 b ± 0.45     | 20.57 bc ± 0.43   | AC58*WOM | 94.53 j-s ± 1.30   | 13.25 e-q ± 0.08   | 10.87 n-ah ± 1.00 |
| AC29*WOM | 89.67 x-ag ± 0.44  | 12.02 k-aa ± 0.44  | 10.23 o-ah ± 1.89 | AC58*WM  | 86.40 ah-am ± 1.20 | 13.82 b-k ± 0.80   | 8.70 u-ai ± 0.35  |
| AC29*WM  | 113.53 b ± 0.18    | 11.45 o-ad ± 0.85  | 10.83 n-ah ± 1.19 | AC59*WOM | 96.07 i-m ± 0.77   | 13.09 e-s ± 0.27   | 12.63 i-x ± 0.67  |
| AC30*WOM | 94.20 j-t ± 0.72   | 11.22 s-ah ± 0.50  | 18.60 c-f ± 2.84  | AC59*WM  | 89.67 x-ag ± 0.13  | 13.08 e-s ± 0.06   | 12.50 i-y ± 0.71  |

PH: plant height, LA: leaf area, TCC: total chlorophyll content, WOM: control (without application of moringa organ extract), WM: with application of moringa organ extract. Any values of means with the same letter in the same column are not significant according to the Multiple Rang Duncan's test at  $p \leq 0.05$ .

**Table S2.** Mean pairwise comparisons of the interaction between 59 barley accessions and foliar MOE application with yield contributing traits, based on the Multiple Range Duncan's test at  $p \leq 0.05$ . Any values of means holding common letter are not significant.

| Accessions*Treatments | TNP                   | SNP                   | SL (cm)               | AL (cm)                | SW (g)                | SNS                    | SWS (g)              | 1000 KW (g)            | TY (g)                  | STW (g)                  |
|-----------------------|-----------------------|-----------------------|-----------------------|------------------------|-----------------------|------------------------|----------------------|------------------------|-------------------------|--------------------------|
| AC1*WOM               | 7.67 y-af $\pm$ 0.33  | 5.33 aa-ae $\pm$ 0.88 | 4.24 aq-ax $\pm$ 0.39 | 10.81 y-an $\pm$ 0.39  | 1.76 uvw $\pm$ 0.08   | 34.56 a-e $\pm$ 0.39   | 2.43 g-l $\pm$ 0.04  | 51.00 l-r $\pm$ 1.46   | 32.55 al-ao $\pm$ 2.71  | 133.74 au-av $\pm$ 0.90  |
| AC1*WM                | 7.67 y-af $\pm$ 0.67  | 6.00 z-ae $\pm$ 0.58  | 4.59 al-ax $\pm$ 0.14 | 10.90 x-al $\pm$ 0.13  | 2.11 j-m $\pm$ 0.09   | 42.00 wx $\pm$ 0.28    | 2.77 de $\pm$ 0.02   | 50.20 m-z $\pm$ 0.18   | 58.92 ab-ao $\pm$ 9.07  | 186.77 ar-as $\pm$ 3.02  |
| AC2*WOM               | 6.67 ab-af $\pm$ 0.33 | 5.00 ab-ae $\pm$ 0.58 | 7.36 d-n $\pm$ 0.30   | 11.55 n-ac $\pm$ 0.23  | 1.70 wx $\pm$ 0.08    | 28.22 a-l $\pm$ 0.39   | 1.92 t-ab $\pm$ 0.04 | 60.23 bc $\pm$ 1.88    | 59.44 aa-ao $\pm$ 6.70  | 217.95 a-q $\pm$ 2.23    |
| AC2*WM                | 7.00 aa-af $\pm$ 0.58 | 7.00 w-ae $\pm$ 0.58  | 6.34 m-ac $\pm$ 0.13  | 13.69 d-i $\pm$ 0.26   | 2.91 b $\pm$ 0.09     | 53.44 g $\pm$ 0.28     | 3.57 b $\pm$ 0.02    | 54.36 e-l $\pm$ 0.12   | 85.84 t-ao $\pm$ 4.61   | 247.46 a-p $\pm$ 1.54    |
| AC3*WOM               | 7.33 z-af $\pm$ 0.67  | 5.00 ab-ae $\pm$ 0.58 | 3.81 a-x $\pm$ 0.01   | 12.37 j-t $\pm$ 0.57   | 1.89 qrs $\pm$ 0.08   | 44.11 rst $\pm$ 0.39   | 2.27 j-q $\pm$ 0.04  | 43.52 af-ar $\pm$ 1.09 | 17.13 am-ao $\pm$ 0.84  | 99.41 a-x $\pm$ 0.28     |
| AC3*WM                | 5.00 a-f $\pm$ 1.00   | 3.00 a-e $\pm$ 0.00   | 3.78 a-x $\pm$ 0.15   | 12.49 h-q $\pm$ 0.84   | 1.80 s-v $\pm$ 0.09   | 41.33 xy $\pm$ 0.28    | 1.82 w-ae $\pm$ 0.02 | 42.82 aj-a $\pm$ 0.22  | 14.54 an-ao $\pm$ 2.96  | 45.62 a-y $\pm$ 0.99     |
| AC4*WOM               | 8.67 x-af $\pm$ 0.88  | 5.00 ab-ae $\pm$ 0.58 | 6.13 o-ag $\pm$ 0.55  | 10.63 a-ap $\pm$ 0.12  | 2.18 hij $\pm$ 0.08   | 50.44 ijk $\pm$ 0.39   | 2.75 def $\pm$ 0.04  | 45.37 aa-ap $\pm$ 0.96 | 42.83 ag-ao $\pm$ 8.83  | 178.70 a-s $\pm$ 2.94    |
| AC4*WM                | 10.33 u-af $\pm$ 2.03 | 8.33 ab-ae $\pm$ 2.03 | 6.30 m-ac $\pm$ 0.40  | 13.75 c-h $\pm$ 0.26   | 2.42 e $\pm$ 0.09     | 53.33 g $\pm$ 0.28     | 2.92 cd $\pm$ 0.02   | 43.22 ag-at $\pm$ 0.16 | 69.10 y-ao $\pm$ 5.55   | 204.40 aq-ar $\pm$ 1.85  |
| AC5*WOM               | 6.33 ac-af $\pm$ 0.33 | 4.00 ad-ae $\pm$ 0.58 | 3.94 a-x $\pm$ 0.29   | 12.89 f-m $\pm$ 0.75   | 1.32 ah-aj $\pm$ 0.08 | 28.00 a-l $\pm$ 0.39   | 2.03 q-x $\pm$ 0.04  | 47.08 s-af $\pm$ 1.76  | 12.24 a-o $\pm$ 0.66    | 115.25 av-ax $\pm$ 0.22  |
| AC5*WM                | 7.67 y-af $\pm$ 1.33  | 6.33 y-ae $\pm$ 1.20  | 5.43 y-ap $\pm$ 0.13  | 13.38 e-k $\pm$ 0.62   | 1.91 pqr $\pm$ 0.09   | 44.11 rst $\pm$ 0.28   | 2.32 i-o $\pm$ 0.02  | 43.18 ag-au $\pm$ 0.20 | 42.35 ah-ao $\pm$ 2.71  | 157.81 a-t $\pm$ 0.90    |
| AC6*WOM               | 6.67 ab-af $\pm$ 0.88 | 4.00 ad-ae $\pm$ 0.58 | 4.52 am-ax $\pm$ 0.22 | 12.26 j-w $\pm$ 0.10   | 1.60 yz $\pm$ 0.08    | 35.22 ad-ae $\pm$ 0.39 | 1.87 v-ad $\pm$ 0.04 | 45.29 aa-ap $\pm$ 1.38 | 44.06 af-ao $\pm$ 5.51  | 133.74 au-av $\pm$ 1.84  |
| AC6*WM                | 8.33 x-af $\pm$ 0.88  | 6.67 x-ae $\pm$ 0.88  | 5.27 ab-as $\pm$ 0.14 | 14.01 b-f $\pm$ 1.16   | 1.69 wx $\pm$ 0.09    | 44.89 qr $\pm$ 0.28    | 2.07 o-x $\pm$ 0.02  | 37.59 ay-bc $\pm$ 0.23 | 31.30 aj-ao $\pm$ 7.60  | 121.74 av-aw $\pm$ 2.53  |
| AC7*WOM               | 5.33 ae-af $\pm$ 1.45 | 4.00 ad-ae $\pm$ 1.00 | 4.91 al-ax $\pm$ 0.74 | 9.34 ap-av $\pm$ 0.06  | 1.43 ac-ae $\pm$ 0.08 | 39.33 aaa-b $\pm$ 0.39 | 1.72 z-ah $\pm$ 0.04 | 36.90 ba-bd $\pm$ 1.18 | 42.52 ah-ao $\pm$ 5.92  | 153.37 at-au $\pm$ 1.97  |
| AC7*WM                | 6.00 ad-af $\pm$ 0.58 | 4.67 ac-ae $\pm$ 0.33 | 6.47 k-aa $\pm$ 0.41  | 11.05 u-ai $\pm$ 0.24  | 1.64 xy $\pm$ 0.09    | 44.44 qrs $\pm$ 0.28   | 2.13 m-v $\pm$ 0.02  | 36.28 bb-bd $\pm$ 0.24 | 18.20 al-ao $\pm$ 2.29  | 102.23 aw-ax $\pm$ 0.76  |
| AC8*WOM               | 7.33 z-af $\pm$ 0.88  | 4.67 ac-ae $\pm$ 0.88 | 4.44 ao-ax $\pm$ 0.11 | 11.36 p-ag $\pm$ 0.18  | 1.59 yz $\pm$ 0.08    | 34.33 a-e $\pm$ 0.39   | 1.81 w-ae $\pm$ 0.04 | 46.45 x-al $\pm$ 1.43  | 61.29 z-ao $\pm$ 12.62  | 181.25 a-s $\pm$ 4.21    |
| AC8*WM                | 15.33 m-z $\pm$ 2.03  | 13.67 h-v $\pm$ 1.67  | 5.12 af-av $\pm$ 0.17 | 13.38 e-k $\pm$ 0.57   | 1.75 uvw $\pm$ 0.09   | 43.44 tuv $\pm$ 0.28   | 2.05 p-x $\pm$ 0.02  | 40.35 ar-ba $\pm$ 0.22 | 111.22 p-ah $\pm$ 12.05 | 280.27 an-ao $\pm$ 4.02  |
| AC9*WOM               | 8.33 x-af $\pm$ 1.45  | 6.00 z-ae $\pm$ 1.53  | 4.03 at-ax $\pm$ 0.08 | 12.29 j-v $\pm$ 0.25   | 1.97 opq $\pm$ 0.08   | 46.00 op $\pm$ 0.39    | 2.33 i-o $\pm$ 0.04  | 42.95 ah-a $\pm$ 1.05  | 103.61 q-ak $\pm$ 14.42 | 255.60 a-p $\pm$ 4.81    |
| AC9*WM                | 11.67 r-af $\pm$ 1.86 | 9.67 s-ad $\pm$ 2.03  | 4.49 an-ax $\pm$ 0.14 | 11.92 l-ab $\pm$ 0.49  | 2.18 hij $\pm$ 0.09   | 50.67 ij $\pm$ 0.28    | 2.51 e-j $\pm$ 0.02  | 42.72 ak-aw $\pm$ 0.18 | 132.48 j-ab $\pm$ 4.63  | 329.02 ai-aj $\pm$ 1.54  |
| AC10*WOM              | 11.33 s-af $\pm$ 0.67 | 7.67 v-ae $\pm$ 0.88  | 5.09 ag-av $\pm$ 0.35 | 11.17 r-ah $\pm$ 0.01  | 1.71 wx $\pm$ 0.08    | 35.67 ad $\pm$ 0.39    | 2.08 o-w $\pm$ 0.04  | 50.53 m-u $\pm$ 1.39   | 62.70 z-ao $\pm$ 17.44  | 206.04 aq-ar $\pm$ 5.81  |
| AC10*WM               | 10.00 v-af $\pm$ 1.53 | 8.00 u-ae $\pm$ 1.00  | 6.61 i-x $\pm$ 0.60   | 10.87 x-am $\pm$ 0.04  | 2.59 d $\pm$ 0.09     | 51.22 hi $\pm$ 0.28    | 3.06 c $\pm$ 0.02    | 47.82 r-ae $\pm$ 0.14  | 96.95 r-ak $\pm$ 3.19   | 286.90 am-ao $\pm$ 1.06  |
| AC11*WOM              | 8.00 y-af $\pm$ 2.08  | 4.67 ac-ae $\pm$ 1.20 | 4.68 ak-ax $\pm$ 0.15 | 11.91 l-ab $\pm$ 0.40  | 1.89 qrs $\pm$ 0.08   | 36.89 abc $\pm$ 0.39   | 2.31 i-p $\pm$ 0.04  | 51.17 k-r $\pm$ 1.37   | 66.30 z-ao $\pm$ 8.00   | 191.31 ar-as $\pm$ 2.67  |
| AC11*WM               | 11.67 r-af $\pm$ 2.03 | 10.00 r-ad $\pm$ 1.53 | 5.12 af-av $\pm$ 0.28 | 13.44 d-j $\pm$ 0.29   | 1.78 uvw $\pm$ 0.09   | 40.00 z-aa $\pm$ 0.28  | 2.13 m-v $\pm$ 0.02  | 44.49 ad-aq $\pm$ 0.22 | 128.23 l-ad $\pm$ 31.97 | 357.46 ag-ah $\pm$ 10.66 |
| AC12*WOM              | 9.67 w-af $\pm$ 0.33  | 7.67 v-ae $\pm$ 0.88  | 4.83 aj-ax $\pm$ 0.26 | 11.51 n-ad $\pm$ 0.24  | 1.71 wx $\pm$ 0.08    | 35.56 a-d $\pm$ 0.39   | 2.25 j-r $\pm$ 0.04  | 48.04 r-ae $\pm$ 1.39  | 18.13 al-ao $\pm$ 1.88  | 97.44 a-x $\pm$ 0.63     |
| AC12*WM               | 12.33 p-af $\pm$ 1.76 | 9.00 t-ae $\pm$ 1.15  | 5.43 y-ap $\pm$ 0.33  | 10.71 aa-ao $\pm$ 0.32 | 1.86 rst $\pm$ 0.09   | 46.56 no $\pm$ 0.28    | 2.16 l-u $\pm$ 0.02  | 39.88 ar-bb $\pm$ 0.21 | 41.19 ah-ao $\pm$ 7.50  | 155.04 a-t $\pm$ 2.50    |
| AC13*WOM              | 8.00 y-af $\pm$ 0.58  | 7.00 w-ae $\pm$ 0.00  | 4.59 al-ax $\pm$ 0.13 | 13.01 f-m $\pm$ 0.13   | 2.59 d $\pm$ 0.08     | 51.89 h $\pm$ 0.39     | 3.41 b $\pm$ 0.04    | 49.97 n-x $\pm$ 0.97   | 199.49 d-l $\pm$ 46.43  | 466.49 r-v $\pm$ 15.48   |
| AC13*WM               | 16.33 l-x $\pm$ 2.73  | 14.00 g-v $\pm$ 2.08  | 4.86 aj-ax $\pm$ 0.10 | 11.54 n-ac $\pm$ 0.45  | 2.67 c $\pm$ 0.09     | 57.78 d $\pm$ 0.28     | 3.13 c $\pm$ 0.02    | 46.26 x-al $\pm$ 0.14  | 198.28 d-l $\pm$ 8.69   | 439.11 w-aa $\pm$ 2.90   |
| AC14*WOM              | 11.00 t-af $\pm$ 2.08 | 9.00 t-ae $\pm$ 2.65  | 4.85 aj-ax $\pm$ 0.18 | 12.09 k-z $\pm$ 0.13   | 2.13 jkl $\pm$ 0.08   | 38.56 ab $\pm$ 0.39    | 2.43 g-l $\pm$ 0.04  | 55.13 e-i $\pm$ 1.34   | 137.27 i-z $\pm$ 17.78  | 404.59 ac-ae $\pm$ 5.93  |
| AC14*WM               | 11.67 r-af $\pm$ 1.20 | 7.67 v-ae $\pm$ 0.67  | 4.96 ah-aw $\pm$ 0.15 | 12.78 f-n $\pm$ 0.17   | 2.29 fg $\pm$ 0.09    | 53.56 g $\pm$ 0.28     | 2.57 e-i $\pm$ 0.02  | 42.78 aj-a $\pm$ 0.17  | 129.33 k-ac $\pm$ 5.10  | 417.34 aa-ad $\pm$ 1.70  |
| AC15*WOM              | 15.00 m-aa $\pm$ 1.53 | 12.33 k-z $\pm$ 0.88  | 6.41 l-ab $\pm$ 0.18  | 12.26 j-w $\pm$ 0.27   | 2.10 j-m $\pm$ 0.08   | 43.56 s-v $\pm$ 0.39   | 2.77 de $\pm$ 0.04   | 48.20 r-ad $\pm$ 1.14  | 98.00 r-ak $\pm$ 19.39  | 284.82 am-ao $\pm$ 6.46  |
| AC15*WM               | 13.67 o-ad $\pm$ 2.33 | 11.00 o-ac $\pm$ 2.08 | 4.17 as-ax $\pm$ 0.09 | 15.94 a $\pm$ 0.63     | 1.82 r-u $\pm$ 0.09   | 44.44 qrs $\pm$ 0.28   | 2.04 q-x $\pm$ 0.02  | 41.02 aq-az $\pm$ 0.21 | 161.10 f-t $\pm$ 11.09  | 450.77 u-x $\pm$ 3.70    |

|          |                   |                   |                   |                    |                   |                    |                   |                    |                     |                     |
|----------|-------------------|-------------------|-------------------|--------------------|-------------------|--------------------|-------------------|--------------------|---------------------|---------------------|
| AC16*WOM | 12.00 q-af ± 1.53 | 11.33 n-ab ± 1.20 | 5.36 aa-ar ± 0.38 | 13.13 e-l ± 0.06   | 2.18 hij ± 0.08   | 48.78 lm ± 0.39    | 2.51 f-j ± 0.04   | 44.71 ab-aq ± 1.00 | 203.04 d-k ± 39.19  | 480.40 n-t ± 13.06  |
| AC16*WM  | 13.33 o-ae ± 2.33 | 11.33 n-ab ± 2.33 | 6.04 p-ai ± 0.12  | 14.61 bcd ± 0.29   | 2.05 l-o ± 0.09   | 47.22 n ± 0.28     | 2.39 g-m ± 0.02   | 43.37 af-as ± 0.19 | 204.33 d-j ± 23.30  | 488.25 n-r ± 7.77   |
| AC17*WOM | 14.00 n-ad ± 0.58 | 11.67 o-ab ± 0.88 | 4.16 as-ax ± 0.21 | 11.99 l-aa ± 0.27  | 2.23 f-i ± 0.08   | 46.56 no ± 0.39    | 2.39 g-m ± 0.04   | 47.81 r-ae ± 1.06  | 193.78 d-m ± 16.33  | 446.79 v-y ± 5.44   |
| AC17*WM  | 21.33 f-o ± 1.45  | 19.00 a-j ± 1.53  | 5.14 ae-au ± 0.11 | 11.41 o-af ± 0.17  | 1.86 rst ± 0.09   | 42.00 wx ± 0.28    | 2.60 e-h ± 0.02   | 44.20 ae-aq ± 0.21 | 225.27 c-e ± 60.65  | 483.06 n-s ± 20.22  |
| AC18*WOM | 13.33 o-ad ± 1.20 | 9.67 a-n ± 0.33   | 3.98 ao-ax ± 0.30 | 9.67 ap-av ± 0.15  | 1.58 y-aa ± 0.08  | 46.56 no ± 0.39    | 1.75 y-af ± 0.04  | 43.40 af-as ± 0.98 | 30.05 ak-ao ± 1.95  | 131.42 a-v ± 0.65   |
| AC18*WM  | 19.33 i-s ± 1.86  | 11.33 n-ab ± 0.88 | 4.38 ap-ax ± 0.09 | 9.40 ap-av ± 0.41  | 2.12 jkl ± 0.09   | 48.78 lm ± 0.28    | 2.45 g-k ± 0.02   | 33.84 bcd ± 0.18   | 72.39 x-ao ± 12.37  | 323.52 ai-ak ± 4.12 |
| AC19*WOM | 11.67 r-af ± 3.71 | 10.67 p-ac ± 3.18 | 4.71 ak-ax ± 0.10 | 10.79 z-an ± 0.16  | 1.96 opq ± 0.08   | 50.89 ij ± 0.39    | 2.21 k-s ± 0.04   | 38.61 ax-bc ± 0.92 | 93.13 r-al ± 6.03   | 277.95 an-ao ± 2.01 |
| AC19*WM  | 14.33 n-ac ± 2.96 | 9.00 t-ae ± 1.53  | 4.46 an-ax ± 0.35 | 11.19 q-ah ± 0.24  | 1.99 nop ± 0.09   | 56.00 e ± 0.28     | 2.18 k-t ± 0.02   | 35.51 bc-bd ± 0.19 | 95.55 r-ak ± 15.42  | 323.58 ai-ak ± 5.14 |
| AC20*WOM | 13.67 o-ad ± 3.53 | 9.00 t-ae ± 1.53  | 6.98 f-r ± 0.32   | 11.44 o-ae ± 0.35  | 1.10 ap-aq ± 0.08 | 23.89 ao-at ± 0.39 | 1.29 an-at ± 0.04 | 46.18 x-al ± 2.05  | 101.21 r-ak ± 13.95 | 309.99 aj-al ± 4.65 |
| AC20*WM  | 19.67 i-r ± 2.73  | 16.00 e-s ± 1.53  | 6.28 m-ae ± 0.11  | 12.17 j-x ± 0.38   | 1.05 aq-ar ± 0.09 | 22.89 at-av ± 0.28 | 1.27 ao-at ± 0.02 | 45.66 aa-ao ± 0.37 | 106.81 q-aj ± 20.49 | 310.74 aj-al ± 6.83 |
| AC21*WOM | 8.67 x-af ± 2.19  | 8.33 u-ae ± 2.40  | 7.95 a-g ± 0.20   | 15.02 ab ± 0.22    | 2.94 b ± 0.08     | 61.67 b ± 0.39     | 3.35 b ± 0.04     | 47.71 r-ae ± 0.80  | 183.97 d-p ± 25.38  | 444.78 v-z ± 8.46   |
| AC21*WM  | 14.67 n-ab ± 0.88 | 13.33 h-w ± 1.67  | 7.07 f-p ± 0.22   | 13.95 b-g ± 0.17   | 2.48 e ± 0.09     | 52.00 h ± 0.28     | 3.11 c ± 0.02     | 47.63 r-ae ± 0.15  | 220.67 d-g ± 37.91  | 515.06 jkl ± 12.64  |
| AC22*WOM | 11.33 s-af ± 0.33 | 8.00 u-ae ± 0.58  | 4.17 as-ax ± 0.15 | 12.09 k-z ± 0.20   | 1.82 r-u ± 0.08   | 39.33 aaa-b ± 0.39 | 2.04 q-x ± 0.04   | 47.71 r-ae ± 1.25  | 149.82 g-w ± 10.28  | 369.13 af-ag ± 3.43 |
| AC22*WM  | 12.00 q-af ± 1.53 | 9.67 s-ad ± 1.67  | 4.01 au-ax ± 0.08 | 12.31 j-v ± 0.28   | 2.06 k-n ± 0.09   | 43.11 uv ± 0.28    | 2.35 h-n ± 0.02   | 46.33 w-al ± 0.18  | 131.85 j-ab ± 24.44 | 384.57 ae-af ± 8.15 |
| AC23*WOM | 17.67 k-w ± 2.03  | 13.67 h-v ± 2.03  | 7.73 b-i ± 0.29   | 9.21 aq-av ± 0.16  | 1.20 al-ao ± 0.08 | 20.06 bc-be ± 1.16 | 1.38 ak-ar ± 0.04 | 60.39 b ± 5.07     | 120.01 m-ae ± 1.98  | 435.21 x-ab ± 0.66  |
| AC23*WM  | 18.67 j-t ± 1.45  | 12.67 j-y ± 1.86  | 6.83 h-u ± 0.32   | 9.46 ao-av ± 0.14  | 0.85 av-aw ± 0.09 | 19.89 bd-be ± 0.28 | 1.29 an-at ± 0.02 | 42.88 ai-a ± 0.46  | 52.91 ad-ao ± 3.62  | 285.07 am-ao ± 1.21 |
| AC24*WOM | 14.67 n-ab ± 3.38 | 11.67 m-aa ± 1.86 | 7.11 f-p ± 0.15   | 9.40 ap-av ± 0.06  | 1.18 an-ap ± 0.08 | 24.00 ao-as ± 0.39 | 1.33 an-ar ± 0.04 | 49.12 o-aa ± 2.07  | 54.47 ac-ao ± 6.82  | 207.59 aq-ar ± 2.27 |
| AC24*WM  | 17.67 k-w ± 1.20  | 13.67 h-v ± 0.67  | 6.21 o-ag ± 0.12  | 10.45 ac-aq ± 0.27 | 1.16 an-ap ± 0.09 | 23.67 ap-au ± 0.28 | 1.35 am-ar ± 0.02 | 48.80 p-aa ± 0.33  | 154.07 f-v ± 12.22  | 420.02 aa-ad ± 4.07 |
| AC25*WOM | 23.67 e-l ± 1.20  | 18.33 c-l ± 1.86  | 6.78 i-v ± 0.10   | 12.11 k-y ± 0.20   | 1.31 ah-ak ± 0.08 | 21.78 aw-az ± 0.39 | 1.66 ab-aj ± 0.04 | 67.12 a ± 2.43     | 220.47 d-g ± 46.29  | 688.13 c ± 15.43    |
| AC25*WM  | 18.00 j-v ± 3.46  | 13.67 h-v ± 2.85  | 7.92 a-h ± 0.38   | 15.76 a ± 0.59     | 1.57 y-aa ± 0.09  | 23.33 aq-au ± 0.28 | 1.94 t-aa ± 0.02  | 60.21 bc ± 0.21    | 238.10 cde ± 7.70   | 764.32 a ± 1.57     |
| AC26*WOM | 21.33 f-o ± 1.20  | 16.33 e-r ± 0.33  | 6.78 i-v ± 0.11   | 9.97 ah-au ± 0.18  | 1.03 aq-as ± 0.08 | 23.78 ap-at ± 0.39 | 1.16 aq-av ± 0.04 | 44.72 ab-aq ± 2.03 | 112.79 p-ah ± 9.01  | 345.72 ah-ai ± 3.00 |
| AC26*WM  | 18.33 j-u ± 1.76  | 11.33 n-ab ± 2.03 | 6.09 o-ah ± 0.24  | 11.89 l-ab ± 0.85  | 1.05 aq-ar ± 0.09 | 23.56 ap-au ± 0.28 | 1.14 ar-av ± 0.02 | 43.36 af-as ± 0.37 | 145.74 h-x ± 11.95  | 408.95 ac-ad ± 3.98 |
| AC27*WOM | 28.67 a-h ± 4.91  | 21.67 a-e ± 3.71  | 6.07 o-ah ± 0.33  | 12.10 k-z ± 0.37   | 1.17 an-ap ± 0.08 | 23.00 as-av ± 0.39 | 1.36 al-ar ± 0.04 | 53.79 f-m ± 2.19   | 127.47 l-ad ± 3.99  | 326.51 ai-ak ± 1.33 |
| AC27*WM  | 21.00 f-o ± 1.53  | 13.67 h-v ± 0.67  | 6.62 i-x ± 0.12   | 11.23 p-ah ± 0.57  | 1.24 ai-an ± 0.09 | 23.11 ar-av ± 0.28 | 1.43 ai-ap ± 0.02 | 50.95 l-r ± 0.29   | 189.27 d-n ± 11.27  | 491.83 m-q ± 3.76   |
| AC28*WOM | 15.00 m-aa ± 2.52 | 13.00 i-x ± 3.00  | 5.96 p-aj ± 0.21  | 9.91 ah-au ± 0.18  | 1.37 ae-ah ± 0.08 | 24.22 an-aq ± 0.39 | 1.64 ac-ak ± 0.04 | 57.44 b-e ± 2.14   | 191.24 d-n ± 28.97  | 545.36 i ± 9.66     |
| AC28*WM  | 28.33 b-g ± 3.53  | 25.33 a ± 3.18    | 6.49 k-aa ± 0.09  | 14.30 b-e ± 0.35   | 1.50 aa-ac ± 0.09 | 26.11 aj-al ± 0.28 | 1.81 w-ae ± 0.02  | 56.43 d-g ± 0.23   | 185.08 d-p ± 29.68  | 530.44 ijk ± 9.89   |
| AC29*WOM | 20.00 h-q ± 3.21  | 16.00 e-s ± 2.65  | 6.66 i-x ± 0.34   | 14.29 b-e ± 0.21   | 1.29 ah-al ± 0.08 | 22.89 at-av ± 0.39 | 1.54 af-ao ± 0.04 | 56.87 c-f ± 2.26   | 159.67 f-u ± 34.58  | 473.71 o-t ± 11.53  |
| AC29*WM  | 20.33 h-p ± 1.86  | 14.33 g-u ± 1.67  | 8.05 a-f ± 0.20   | 11.29 p-ag ± 0.86  | 1.83 r-u ± 0.09   | 32.11 a-g ± 0.28   | 2.25 j-r ± 0.02   | 56.32 d-h ± 0.19   | 209.59 d-i ± 36.73  | 605.56 g ± 12.24    |
| AC30*WOM | 12.33 p-af ± 0.88 | 11.67 m-aa ± 0.88 | 8.47 abc ± 0.09   | 12.52 h-o ± 0.05   | 1.54 z-ab ± 0.08  | 30.67 a-h ± 0.39   | 1.89 v-ac ± 0.04  | 52.10 i-q ± 1.63   | 221.42 d-g ± 1.46   | 623.87 ef ± 0.49    |
| AC30*WM  | 22.00 f-n ± 1.53  | 18.67 c-k ± 2.03  | 8.53 ab ± 0.10    | 14.91 bc ± 0.26    | 1.72 vwx ± 0.09   | 33.00 a-f ± 0.28   | 2.10 n-v ± 0.02   | 50.15 m-w ± 0.21   | 288.70 bc ± 22.12   | 637.07 e ± 7.73     |
| AC31*WOM | 14.33 n-ac ± 1.20 | 12.00 l-z ± 1.00  | 5.95 p-aj ± 0.27  | 10.12 af-as ± 0.23 | 1.29 ah-al ± 0.08 | 21.78 aw-az ± 0.39 | 1.74 y-ah ± 0.04  | 59.36 bcd ± 2.42   | 168.58 e-r ± 25.75  | 471.16 p-u ± 8.58   |
| AC31*WM  | 17.67 k-w ± 2.33  | 15.67 e-s ± 2.19  | 5.8 s-ak ± 0.05   | 12.70 g-o ± 0.47   | 1.35 ae-ah ± 0.09 | 25.11 am-an ± 0.28 | 1.65 ac-ak ± 0.02 | 53.91 e-m ± 0.26   | 210.74 d-i ± 13.74  | 546.97 i ± 4.58     |
| AC32*WOM | 14.67 n-ab ± 1.67 | 14.00 g-v ± 1.53  | 8.44 abc ± 0.12   | 9.61 al-av ± 0.23  | 1.33 ag-aj ± 0.08 | 26.22 aj-ak ± 0.39 | 1.74 y-ag ± 0.04  | 50.64 m-s ± 1.91   | 135.64 j-z ± 27.58  | 422.51 z-ac ± 9.19  |
| AC32*WM  | 19.33 i-s ± 1.20  | 16.00 e-s ± 1.00  | 7.61 b-k ± 0.19   | 11.29 p-ag ± 0.38  | 1.16 an-ap ± 0.09 | 23.67 ap-au ± 0.28 | 1.47 ah-ap ± 0.02 | 49.15 o-aa ± 0.32  | 198.95 d-l ± 34.13  | 458.16 t-w ± 11.38  |

|          |                   |                   |                   |                    |                   |                    |                   |                    |                     |                     |
|----------|-------------------|-------------------|-------------------|--------------------|-------------------|--------------------|-------------------|--------------------|---------------------|---------------------|
| AC33*WOM | 18.00 j-v ± 2.08  | 14.00 g-v ± 1.73  | 6.07 o-ah ± 0.22  | 10.41 ac-ar ± 0.06 | 0.91 at-av ± 0.08 | 21.33 ay-bb ± 0.39 | 1.05 as-aw ± 0.04 | 42.66 al-aw ± 2.25 | 112.65 p-ah ± 8.56  | 422.40 z-ac ± 2.85  |
| AC33*WM  | 21.00 f-o ± 1.15  | 16.33 e-r ± 1.20  | 6.48 k-aa ± 0.06  | 9.51 an-av ± 0.41  | 0.87 au-aw ± 0.09 | 20.78 ba-bd ± 0.28 | 1.05 as-aw ± 0.02 | 42.07 an-ax ± 0.45 | 122.82 m-ae ± 13.72 | 494.07 l-p ± 4.57   |
| AC34*WOM | 32.67 abc ± 1.15  | 20.33 a-g ± 2.60  | 8.26 a-e ± 0.12   | 9.13 aq-av ± 0.34  | 1.04 aq-as ± 0.08 | 22.22 av-ay ± 0.39 | 1.21 ap-au ± 0.04 | 46.63 a-j ± 2.21   | 150.11 g-w ± 39.10  | 496.21 l-o ± 13.03  |
| AC34*WM  | 20.00 h-q ± 5.04  | 11.00 o-ac ± 0.58 | 7.66 b-j ± 0.17   | 11.00 v-aj ± 0.42  | 1.15 an-ap ± 0.09 | 25.33 ak-am ± 0.28 | 1.31 an-as ± 0.02 | 45.38 aa-ap ± 0.33 | 95.22 r-ak ± 10.55  | 438.95 w-aa ± 3.52  |
| AC35*WOM | 15.00 m-aa ± 1.53 | 13.33 h-w ± 0.88  | 6.47 k-aa ± 0.55  | 12.47 i-r ± 0.42   | 2.07 k-n ± 0.08   | 44.78 qr ± 0.39    | 2.21 k-s ± 0.04   | 50.18 m-s ± 1.10   | 118.98 n-af ± 22.52 | 464.49 s-v ± 7.51   |
| AC35*WM  | 20.00 h-q ± 4.51  | 15.33 e-t ± 2.40  | 5.59 w-an ± 0.32  | 8.46 a-v ± 0.25    | 2.21 ghi ± 0.09   | 44.11 rst ± 0.28   | 2.56 e-i ± 0.02   | 46.25 x-al ± 0.17  | 149.45 g-w ± 23.20  | 535.37 ijk ± 7.73   |
| AC36*WOM | 11.67 r-af ± 0.88 | 11.33 n-ab ± 0.67 | 5.88 q-aj ± 0.25  | 9.66 al-av ± 0.05  | 1.42 ac-af ± 0.08 | 27.67 a-l ± 0.39   | 1.60 ad-am ± 0.04 | 51.37 j-r ± 1.82   | 55.34 ac-ao ± 4.07  | 188.50 ar-as ± 1.36 |
| AC36*WM  | 27.67 b-h ± 2.40  | 23.67 abc ± 2.40  | 5.71 t-al ± 0.19  | 11.13 s-ah ± 0.24  | 1.46 ab-ad ± 0.09 | 28.44 a-l ± 0.28   | 1.42 aj-aq ± 0.02 | 51.21 k-r ± 0.25   | 88.37 t-an ± 16.70  | 295.03 al-an ± 5.57 |
| AC37*WOM | 20.00 h-q ± 4.04  | 19.33 a-i ± 4.70  | 6.88 g-s ± 0.14   | 10.71 aa-ao ± 0.30 | 1.16 an-ap ± 0.08 | 24.78 am-ao ± 0.39 | 1.31 an-as ± 0.04 | 46.70 t-ai ± 1.98  | 89.89 t-am ± 1.20   | 267.44 ao-ap ± 0.40 |
| AC37*WM  | 28.00 b-h ± 3.61  | 21.00 a-f ± 1.00  | 5.82 r-ak ± 0.12  | 10.71 aa-ao ± 0.24 | 1.29 ah-al ± 0.09 | 27.67 a-l ± 0.28   | 1.81 x-ae ± 0.02  | 46.58 t-ak ± 0.30  | 166.82 e-s ± 8.54   | 471.47 p-u ± 2.85   |
| AC38*WOM | 27.33 b-i ± 4.18  | 23.00 a-d ± 2.52  | 7.06 f-p ± 0.10   | 9.61 al-av ± 0.18  | 0.96 as-au ± 0.08 | 20.89 az-bc ± 0.39 | 1.12 ar-av ± 0.04 | 52.97 g-n ± 2.34   | 135.09 j-aa ± 14.69 | 417.18 aa-ad ± 4.90 |
| AC38*WM  | 25.00 d-k ± 2.31  | 21.67 a-e ± 1.76  | 5.72 s-al ± 0.18  | 10.41 ac-ar ± 0.17 | 1.24 aj-an ± 0.09 | 23.33 aq-au ± 0.28 | 1.52 af-ao ± 0.02 | 45.85 z-an ± 0.29  | 103.49 q-ak ± 25.30 | 413.67 ab-ad ± 8.43 |
| AC39*WOM | 19.00 j-t ± 2.08  | 17.33 d-o ± 1.67  | 6.08 o-ah ± 0.03  | 12.40 j-t ± 0.29   | 1.21 al-an ± 0.08 | 21.67 ax-ba ± 0.39 | 1.48 af-ao ± 0.04 | 56.02 d-h ± 2.39   | 107.60 q-ai ± 12.32 | 333.46 a-i ± 4.11   |
| AC39*WM  | 21.00 f-o ± 1.15  | 18.67 c-k ± 0.88  | 6.18 o-ag ± 0.03  | 11.50 n-ad ± 0.78  | 1.22 ak-an ± 0.09 | 22.33 av-ax ± 0.28 | 1.55 ae-an ± 0.02 | 54.70 e-k ± 0.29   | 252.79 cd ± 48.98   | 636.66 e ± 16.33    |
| AC40*WOM | 11.00 t-af ± 1.00 | 10.33 q-ad ± 0.88 | 6.31 m-ac ± 0.12  | 12.70 g-o ± 0.42   | 1.32 ag-aj ± 0.08 | 24.11 ao-ar ± 0.39 | 1.62 ad-al ± 0.04 | 54.95 e-j ± 2.13   | 73.23 x-ao ± 9.13   | 304.09 ak-am ± 3.04 |
| AC40*WM  | 19.33 i-s ± 0.88  | 17.00 d-p ± 0.58  | 6.51 k-aa ± 0.09  | 12.17 j-x ± 0.64   | 1.34 af-ai ± 0.09 | 25.11 am-an ± 0.28 | 1.73 y-ah ± 0.02  | 53.18 g-n ± 0.27   | 87.88 t-an ± 3.27   | 299.76 al-an ± 1.09 |
| AC41*WOM | 18.67 j-t ± 4.10  | 16.67 d-q ± 3.76  | 8.21 a-e ± 0.20   | 10.29 ac-ar ± 0.32 | 1.19 am-ap ± 0.08 | 25.33 ak-am ± 0.39 | 1.48 ag-ap ± 0.04 | 47.01 s-ag ± 1.94  | 120.65 m-ae ± 44.91 | 470.04 q-u ± 14.97  |
| AC41*WM  | 21.00 f-o ± 3.61  | 16.00 e-s ± 1.53  | 6.64 i-x ± 0.41   | 12.33 j-u ± 0.15   | 0.92 at-av ± 0.09 | 21.89 aw-ay ± 0.28 | 1.14 ar-av ± 0.02 | 41.81 ap-ax ± 0.43 | 107.54 q-ai ± 15.76 | 376.04 af-ag ± 5.25 |
| AC42*WOM | 17.67 k-w ± 2.91  | 15.00 f-t ± 2.89  | 7.55 b-l ± 0.13   | 10.81 y-an ± 0.26  | 1.41 ad-ag ± 0.08 | 27.89 a-l ± 0.39   | 1.69 aa-ai ± 0.04 | 50.54 m-t ± 1.80   | 82.73 v-ao ± 7.25   | 267.95 ao-ap ± 2.42 |
| AC42*WM  | 21.00 f-o ± 2.00  | 16.67 d-q ± 1.45  | 6.5 k-aa ± 0.18   | 10.89 x-am ± 0.44  | 1.23 ak-an ± 0.09 | 25.22 al-am ± 0.28 | 1.51 af-ao ± 0.02 | 48.58 p-ab ± 0.31  | 120.93 m-ae ± 8.45  | 361.59 ag-ah ± 2.82 |
| AC43*WOM | 13.67 o-ad ± 0.88 | 13.67 h-v ± 0.88  | 4.22 ar-ax ± 0.29 | 10.13 ae-ar ± 0.24 | 2.30 f ± 0.08     | 50.11 jk ± 0.39    | 2.49 g-j ± 0.04   | 46.00 y-am ± 0.98  | 210.43 d-i ± 15.85  | 539.41 ij ± 5.28    |
| AC43*WM  | 20.33 h-p ± 1.76  | 17.67 c-n ± 1.45  | 4.19 as-ax ± 0.01 | 10.21 ad-ar ± 0.39 | 2.05 l-o ± 0.09   | 49.56 kl ± 0.28    | 2.42 g-l ± 0.02   | 41.29 aq-ay ± 0.19 | 214.11 d-h ± 18.24  | 512.38 klm ± 6.08   |
| AC44*WOM | 23.67 e-l ± 2.19  | 18.33 c-l ± 1.45  | 6.27 m-af ± 0.22  | 9.17 aq-av ± 0.09  | 0.82 a-w ± 0.08   | 19.33 be-bf ± 0.39 | 0.93 av-ay ± 0.04 | 42.21 am-ax ± 2.47 | 70.85 x-ao ± 5.14   | 449.93 u-x ± 1.71   |
| AC44*WM  | 32.33 bcd ± 4.26  | 18.33 c-l ± 3.76  | 6.01 p-ai ± 0.25  | 9.21 aq-av ± 0.19  | 0.89 au-aw ± 0.09 | 22.67 au-aw ± 0.28 | 1.04 at-ax ± 0.02 | 39.40 au-bb ± 0.44 | 96.00 r-ak ± 19.11  | 424.84 y-ac ± 6.37  |
| AC45*WOM | 18.00 j-v ± 2.65  | 13.67 h-v ± 2.40  | 6.87 g-t ± 0.25   | 9.73 aj-av ± 0.22  | 1.11 ap-aq ± 0.08 | 21.89 aw-ay ± 0.39 | 1.27 ao-at ± 0.04 | 50.56 m-t ± 2.29   | 111.93 p-ah ± 10.59 | 355.47 ag-ah ± 3.53 |
| AC45*WM  | 18.67 j-t ± 1.45  | 14.00 g-v ± 1.00  | 7.22 e-o ± 0.37   | 8.85 as-av ± 0.19  | 1.28 ah-am ± 0.09 | 28.56 a-l ± 0.28   | 1.55 ae-an ± 0.02 | 44.63 ac-aq ± 0.30 | 177.13 e-q ± 12.90  | 499.26 lmn ± 4.30   |
| AC46*WOM | 28.00 b-h ± 3.21  | 19.00 b-j ± 3.06  | 7.02 f-q ± 0.45   | 9.69 ak-av ± 0.09  | 0.81 a-w ± 0.08   | 20.56 bb-bd ± 0.39 | 0.96 au-ay ± 0.04 | 45.70 aa-ao ± 2.29 | 84.67 u-ao ± 23.46  | 406.19 ac-ae ± 7.82 |
| AC46*WM  | 28.33 b-g ± 2.03  | 19.33 a-i ± 1.20  | 6.81 h-v ± 0.21   | 11.77 m-ab ± 0.34  | 1.12 ao-aq ± 0.09 | 24.44 am-ap ± 0.28 | 1.31 an-as ± 0.02 | 39.34 a -bb ± 0.34 | 100.09 r-ak ± 18.35 | 493.01 l-q ± 6.12   |
| AC47*WOM | 19.67 i-r ± 2.85  | 15.33 e-t ± 2.19  | 4.95 ah-aw ± 0.21 | 8.81 at-av ± 0.33  | 0.66 a-x ± 0.08   | 17.78 b-g ± 0.39   | 0.77 a-y ± 0.04   | 37.22 ba-bd ± 2.61 | 51.01 ae-ao ± 14.15 | 323.21 ai-ak ± 4.72 |
| AC47*WM  | 37.33 a ± 4.91    | 25.00 ab ± 3.61   | 5.23 ac-as ± 0.19 | 9.77 ai-au ± 0.26  | 0.67 a-x ± 0.09   | 18.67 b-f ± 0.28   | 0.78 a-y ± 0.02   | 35.69 bc-bd ± 0.55 | 88.14 t-an ± 13.95  | 414.50 ab-ad ± 4.65 |
| AC48*WOM | 28.00 b-h ± 2.08  | 17.67 c-n ± 1.20  | 5.56 x-ao ± 0.21  | 12.38 j-t ± 0.21   | 0.70 a-x ± 0.08   | 19.22 be-bf ± 0.39 | 0.81 aw-ay ± 0.04 | 36.20 bb-bd ± 2.40 | 92.87 s-al ± 7.06   | 420.16 aa-ad ± 2.35 |
| AC48*WM  | 33.67 ab ± 2.33   | 19.00 b-j ± 1.53  | 5.68 u-al ± 0.15  | 9.13 ar-av ± 0.27  | 0.70 a-x ± 0.09   | 20.67 bb-bd ± 0.28 | 0.81 aw-ay ± 0.02 | 33.82 bcd ± 0.55   | 62.35 z-ao ± 16.42  | 385.63 ae-af ± 5.47 |
| AC49*WOM | 13.67 o-ad ± 3.28 | 11.67 m-aa ± 1.76 | 4.13 as-ax ± 0.10 | 11.09 t-ah ± 0.38  | 2.12 jkl ± 0.08   | 42.78 vw ± 0.39    | 2.39 g-m ± 0.04   | 49.61 n-z ± 1.17   | 122.59 m-ae ± 2.76  | 492.08 m-q ± 0.92   |
| AC49*WM  | 16.33 l-x ± 0.88  | 9.67 s-ad ± 0.33  | 4.24 aq-ax ± 0.06 | 10.37 ac-ar ± 0.18 | 2.13 jkl ± 0.09   | 43.78 stu ± 0.28   | 2.40 g-l ± 0.02   | 48.53 p-ab ± 0.18  | 187.83 d-o ± 16.58  | 488.02 n-r ± 5.53   |

|          |                   |                  |                   |                    |                   |                    |                   |                    |                     |                     |
|----------|-------------------|------------------|-------------------|--------------------|-------------------|--------------------|-------------------|--------------------|---------------------|---------------------|
| AC50*WOM | 21.00 f-o ± 2.08  | 18.00 c-m ± 2.65 | 5.19 ac-as ± 0.20 | 9.92 ah-au ± 0.60  | 1.70 wx ± 0.08    | 40.78 yz ± 0.39    | 1.90 u-ac ± 0.04  | 41.62 ap-ax ± 1.17 | 216.33 d-h ± 9.79   | 546.30 i ± 3.26     |
| AC50*WM  | 17.33 k-w ± 2.91  | 12.00 l-z ± 1.53 | 5.19 ac-as ± 0.20 | 11.01 v-aj ± 0.91  | 1.71 vwx ± 0.09   | 43.11 uv ± 0.28    | 2.00 r-y ± 0.02   | 39.67 as-bb ± 0.23 | 211.35 d-i ± 24.38  | 598.69 h ± 8.13     |
| AC51*WOM | 10.00 v-af ± 0.58 | 9.00 t-ae ± 0.58 | 6.54 j-y ± 0.03   | 12.14 j-x ± 0.29   | 2.00 no ± 0.08    | 50.78 ij ± 0.39    | 2.35 g-n ± 0.04   | 39.47 at-bb ± 0.93 | 62.57 z-ao ± 23.83  | 283.46 am-ao ± 7.94 |
| AC51*WM  | 14.00 n-ad ± 1.53 | 8.00 u-ae ± 1.15 | 5.54 x-ao ± 0.33  | 13.03 f-m ± 0.20   | 1.81 stu ± 0.09   | 46.44 no ± 0.28    | 1.92 t-ab ± 0.02  | 38.94 aw-bc ± 0.22 | 75.18 w-ao ± 9.73   | 298.77 al-an ± 3.24 |
| AC52*WOM | 30.00 b-e ± 1.73  | 17.67 c-n ± 1.45 | 7.41 c-m ± 0.21   | 9.58 am-av ± 0.42  | 0.97 ar-at ± 0.08 | 19.44 be-bf ± 0.39 | 1.15 ar-av ± 0.04 | 49.85 n-x ± 2.57   | 59.21 aa-ao ± 3.30  | 293.99 al-an ± 1.10 |
| AC52*WM  | 18.67 j-t ± 1.20  | 15.33 e-t ± 1.45 | 6.06 p-ai ± 0.23  | 9.35 ap-av ± 0.32  | 0.85 av-aw ± 0.09 | 20.11 bc-be ± 0.28 | 0.98 au-ay ± 0.02 | 42.27 am-ax ± 0.46 | 81.31 v-ao ± 11.31  | 440.60 w-aa ± 3.77  |
| AC53*WOM | 26.00 c-j ± 4.16  | 16.67 d-q ± 2.40 | 5.37 z-aq ± 0.14  | 9.60 al-av ± 0.29  | 0.68 a-x ± 0.08   | 17.22 b-g ± 0.39   | 0.79 ax-ay ± 0.04 | 39.34 a -bb ± 2.73 | 43.31 af-ao ± 6.28  | 344.22 ah-ai ± 2.09 |
| AC53*WM  | 20.67 g-o ± 1.45  | 16.67 d-q ± 0.88 | 6.17 o-ag ± 0.11  | 10.25 ac-ar ± 0.46 | 0.97 ar-at ± 0.09 | 26.67 a-j ± 0.28   | 1.15 ar-av ± 0.02 | 36.45 bb-bd ± 0.40 | 80.51 v-ao ± 7.62   | 398.72 ad-ae ± 2.54 |
| AC54*WOM | 20.33 h-p ± 3.18  | 15.33 e-t ± 1.20 | 8.97 a ± 0.42     | 10.17 ae-ar ± 0.12 | 1.44 ac-ae ± 0.08 | 24.00 ao-as ± 0.39 | 1.74 y-ag ± 0.04  | 59.85 bc ± 2.20    | 103.19 q-ak ± 22.73 | 304.51 ak-am ± 7.58 |
| AC54*WM  | 17.33 k-w ± 2.03  | 14.33 g-u ± 2.19 | 6.75 i-w ± 0.25   | 10.07 ag-at ± 0.23 | 1.18 an-ap ± 0.09 | 25.11am-an ± 0.28  | 1.38 ak-ar ± 0.02 | 46.78 t-ah ± 0.32  | 82.20 v-ao ± 1.57   | 265.45 ao-ap ± 0.52 |
| AC55*WOM | 19.00 j-t ± 1.15  | 15.33 e-t ± 1.67 | 6.78 i-v ± 2.33   | 11.81 l-ab ± 0.37  | 2.03 mno ± 0.08   | 48.33 m ± 0.39     | 2.60 e-h ± 0.04   | 52.70 h-o ± 0.99   | 318.66 ab ± 28.38   | 720.57 b ± 9.46     |
| AC55*WM  | 15.00 m-aa ± 0.58 | 13.33 h-w ± 0.33 | 5.39 y-ap ± 0.06  | 11.19 q-ah ± 0.54  | 2.87 b ± 0.09     | 54.44 f ± 0.28     | 3.45 b ± 0.02     | 41.90 ao-ax ± 0.13 | 356.27 a ± 88.78    | 762.60 a ± 29.59    |
| AC56*WOM | 21.00 f-o ± 3.06  | 14.33 g-u ± 2.91 | 6.06 o-ah ± 0.71  | 10.98 w-ak ± 0.31  | 1.82 r-u ± 0.08   | 39.78 a-a ± 0.39   | 2.44 g-k ± 0.04   | 45.75 aa-an ± 1.23 | 49.73 ae-ao ± 11.80 | 279.20 an-ao ± 3.93 |
| AC56*WM  | 23.00 e-m ± 1.73  | 19.67 a-h ± 1.76 | 5.19 ac-as ± 0.14 | 11.01 v-aj ± 0.13  | 1.69 wx ± 0.09    | 41.89 wx ± 0.28    | 1.98 s-z ± 0.02   | 40.36 ar-ba ± 0.23 | 118.58 n-ag ± 15.97 | 478.41 n-t ± 5.32   |
| AC57*WOM | 15.33 m-z ± 0.88  | 12.33 k-z ± 1.45 | 6.24 n-ag ± 0.21  | 9.19 aq-av ± 0.16  | 1.69 wx ± 0.08    | 45.22 pq ± 0.39    | 2.02 q-x ± 0.04   | 39.90 ar-bb ± 1.03 | 113.62 o-ah ± 5.42  | 357.34 ag-ah ± 1.81 |
| AC57*WM  | 15.33 m-z ± 1.76  | 12.67 j-y ± 0.88 | 6.53 j-z ± 0.10   | 8.71 au-av ± 0.23  | 2.24 fgh ± 0.09   | 56.11 e ± 0.28     | 2.62 efg ± 0.02   | 37.44 az-bc ± 0.17 | 142.69 h-y ± 3.50   | 417.31 aa-ad ± 1.17 |
| AC58*WOM | 15.67 l-y ± 2.40  | 13.33 h-w ± 2.03 | 5.65 v-am ± 0.12  | 13.33 e-k ± 0.13   | 2.14 ijk ± 0.08   | 41.11 xy ± 0.39    | 3.13 c ± 0.04     | 52.16 i-p ± 1.23   | 143.06 h-y ± 20.44  | 384.09 ae-af ± 6.81 |
| AC58*WM  | 17.67 k-w ± 3.18  | 15.67 e-s ± 2.85 | 5.89 q-aj ± 0.12  | 12.41 j-s ± 0.27   | 2.48 e ± 0.09     | 51.11 hi ± 0.28    | 3.00 c ± 0.02     | 48.48 p-ac ± 0.15  | 209.82 d-i ± 25.86  | 663.44 d ± 8.62     |
| AC59*WOM | 18.33 j-u ± 4.10  | 15.00 f-t ± 3.21 | 5.16 ad-at ± 0.17 | 13.10 e-l ± 0.19   | 2.95 b ± 0.08     | 59.33 c ± 0.39     | 3.44 b ± 0.04     | 49.74 n-y ± 0.84   | 220.68 d-g ± 10.02  | 574.80 i ± 3.34     |
| AC59*WM  | 18.00 j-v ± 4.16  | 15.33 e-t ± 2.96 | 5.56 x-ao ± 0.21  | 12.87 f-m ± 0.28   | 3.49 a ± 0.09     | 72.11 a ± 0.28     | 4.03 a ± 0.02     | 48.34 q-ad ± 0.11  | 363.27 a ± 35.29    | 739.16 b ± 11.76    |

TNP: number of the tillers per plant, SNP: number of the spikes per plant, SL: spike length, AL: awan length, SW: spike weight, SNS: number of seeds per spike, SWS: seed weight per spike, 1000 KW: one thousand kernel weight, TY: total yield per plot, STW: straw weight per plot. WOM: control (without application of moringa organ extract), WM: with application of moringa organ extract. Any values of means with the same letter in the same column are not significant according to the Multiple Rang Duncan's test at  $p \leq 0.05$ .
